# Supplementary material for: Dupilumab-Associated Mucin Deficiency (DAMD)
Source: PubMed Central journal article supplement — Transl Vis Sci Technol. 2020 Feb 25;9(3):29. doi: 10.1167/tvst.9.3.29 (PMC7354879; doi:10.1167/tvst.9.3.29), 2020-02-25
Supplement: tvst-9-3-29_s001.pdf [file tvst-9-3-29_s001.pdf]

# The Effect of Dupixent on Tear Mucin Levels

Name :

Date of Birth :

|                                               |       |           |       |
|-----------------------------------------------|-------|-----------|-------|
| <b>1 Ocular Fatigue / Eye Strain</b> - Always | Often | Sometimes | Never |
| <b>2 Uncomfortable Sensation</b> - Always     | Often | Sometimes | Never |
| <b>3 Dry Sensation</b> - Always               | Often | Sometimes | Never |
| <b>4 Heavy Sensation</b> - Always             | Often | Sometimes | Never |
| <b>5 Sensitivity to Bright Light</b> - Always | Often | Sometimes | Never |
| <b>6 Pain</b> - Always                        | Often | Sometimes | Never |
| <b>7 Blurred Vision</b> - Always              | Often | Sometimes | Never |
| <b>8 Discharge</b> - Always                   | Often | Sometimes | Never |
| <b>9 Foreign Body Sensation</b> - Always      | Often | Sometimes | Never |
| <b>10 Red Eye</b> - Always                    | Often | Sometimes | Never |
| <b>11 Itching</b> - Always                    | Often | Sometimes | Never |
| <b>12 Excess tearing</b> - Always             | Often | Sometimes | Never |
